# Alternate response of *Bacillus anthracis* *atxA* and *acpA* to serum, $\text{HCO}_3^-$ and $\text{CO}_2$

Ψ Itai Glinert, ΨElad Bar-David, Amir Ben-Shmuel, Assa, Sittner, Reut Puni, Shira Laredo, David Kobiler, Shay Weiss and Haim Levy\*

Department of Infectious Diseases, Israel Institute for Biological Research, P.O. Box 19, Ness Ziona 74100, Israel.

Ψ equal contribution

\*corresponding author

[haiml@iibr.gov.il](mailto:haiml@iibr.gov.il)

## Abstract

*Bacillus anthracis* overcome host immune response by producing capsule and secreting toxins. Production of these virulence factors in response to host environment was shown to be regulated by *atxA*, the major virulence regulator, that was shown to be activated by  $\text{HCO}_3^-$  and  $\text{CO}_2$ . While toxin production is regulated directly by *atxA*, capsule production is mediated by either one of two regulators; *acpA* and *acpB*. In addition, it was demonstrated that *acpA* gene have at least two promoters were one of them was linked to *atxA*. We used a genetic approach to study capsule and toxin production under different conditions. Unlike previous works that used NBY- $\text{HCO}_3^-$  medium in a  $\text{CO}_2$  enriched atmosphere, we used a sDMEM based medium in which toxins and capsule production can be induced in *B. anthracis* in ambient or  $\text{CO}_2$  enriched atmosphere. Using this system, we could differentiate between induction by 10% NRS, 10%  $\text{CO}_2$  or 0.75%  $\text{HCO}_3^-$ . In response to high  $\text{CO}_2$ , capsule production is induced by *acpA* in an *atxA* independent manner, while little or no toxins (protective antigen PA) is produced. *atxA* is activated in response to serum in  $\text{CO}_2$  independent manner and induce toxins production and capsule production in an *acpA* or *acpB* dependent manner.  $\text{HCO}_3^-$  activates *atxA* as well, however in non-physiological concentrations. Our findings might be relevant to the first stages of inhalational infection where in the dendritic cell the germinating spore must be protected by the capsule without effecting cell migration to the draining lymph-node by toxin secretion.

## Introduction

*Bacillus anthracis*, the causative agent of anthrax, is a gram positive, spore forming bacterium that infect humans via three major routes; lung (inhalation), cutaneous and the gut (digestion) [1, 2]. The infectious form of *B. anthracis* is the spore, that are durable and survive in the environment for decades. In response to the host environment the spore germinates and overcomes the immune system by two major virulence factors; poly- $\delta$ -D-glutamic antiphagocytic capsule and the tripartite toxins [3]. The capsule producing genes are encoded as a polycistronic gene cluster on the pXO2 virulence plasmid, *capB,C,A,D,E*. CapB and CapC are the polymerization units while CapA and CapE form the transport channel that exports the capsule polymer from the cytoplasm through the cell wall and membrane to the cell surface [4-6]. On the cell surface CapD hydrolyzes the polymer to shorter chains and covalently link them to the cell wall [7]. The same CapD regulate the length of the bound polymer chains by its hydrolyzation activity [4, 8, 9]. The tripartite toxins are encoded by the pXO1 virulence plasmid, by *pag* (protective antigen-PA), *lef* (lethal factor-LF) and *cya* (edema factor-EF) [1]. LF is a metalloprotease that specifically cleaves members of the MAP kinase regulatory pathway of mammalian cells [10]. EF is a potent calmodulin dependent adenylate cyclase that interferes with cell regulation by elevating the internal cAMP levels [11]. Both LF and EF are driven into the mammalian cells by PA that binds specific receptors ANTXR1 (TEM8) and ANTXR2 (CMG2) [12]. PA binds to the receptor, processed by cell associated furin and oligomerize to form a heptamer that bind LF and EF in a 2:1 ratio [12, 13]. The complex is then phagocytosed and upon lysosome fusion and pH drop the PA complex undergoes a conformational modification the results in LF and EF injection into the cytoplasm. Toxin activity causes, among other, inactivation of immune cells and immune response [12].

The *atxA* was shown to be the major virulence regulator of *B. anthracis* virulent [2, 14]. This pXO1 encoded protein activates a cascade of regulatory processes that results in up and down regulation of chromosomal and plasmid encoded genes [15]. The capsule production is regulated by two pXO2 encoded gene products, *acpA* [15] and *acpB* [16, 17]. Though it was demonstrated that *atxA* regulates these two genes [18], it is not essential for capsule production since  $\Delta$ pXO1 strains produces capsule [19, 20]. Since *B. anthracis* do not produce toxins and capsule under normal laboratory growth conditions, a specific host simulating growth condition were generated. It was reported that growth of *B. anthracis* in NBY broth supplemented with glucose and bicarbonate in 5-15% CO<sub>2</sub> atmosphere results in toxin secretion and capsule production [16, 20-22]. These growth conditions were used to study different aspects of virulence regulation in *B. anthracis* and these findings indicated that *atxA* is induced in response to HCO<sub>3</sub><sup>-</sup> and CO<sub>2</sub>, activating both toxin and capsule production. This concept implies that toxins and capsule are produced simultaneously in the host.

78 Previously we reported that growth of *B. anthracis* in sDMEM high glucose cell culture medium  
 79 supplemented with pyruvate glutamine, nonessential amino acid (referred to in this work as sDMEM) with  
 80 addition of 10% serum and incubated in 10%CO<sub>2</sub> atmosphere, induces virulence factor production [17, 19].  
 81 Herein we demonstrate that sDMEM can be used to examine the effect of serum (normal rabbit serum -  
 82 NRS), HCO<sub>3</sub><sup>-</sup> and/or CO<sub>2</sub> atmosphere, on the regulation of toxin or capsule production. Using a genetic  
 83 approach, we demonstrate that unlike previous reports, *atxA* is induced by NRS or HCO<sub>3</sub><sup>-</sup> but not CO<sub>2</sub>.  
 84 The capsule regulator *acpA* was induced by CO<sub>2</sub> in an *atxA* independent manner and by NRS in an *atxA*  
 85 dependent manner. The *acpB* was activated only in *atxA* dependent manner when deletion of the later  
 86 resulted in loss of *acpB* regulation of capsule production. Our results indicate that the capsule could be  
 87 produced independently of the toxins while the toxins will always be co-induced with the capsule.  
 88



## Materials and Methods

### Bacterial strains, media and growth conditions.

Bacterial strains used in this study are listed in Table 1. For the induction of toxins and capsule production, a modified DMEM (supplemented with 4mM L-glutamine, 1 mM Sodium pyruvate, 1% non-essential amino acid) that was supplemented with 10% normal rabbit serum or 0.75% NaHCO<sub>3</sub> (Biological Industries - Israel). Spores of the different mutants were seeds to a concentration of 5x10<sup>5</sup> CFU/ml and grown in 96 well tissue culture plate (100μl per well) for 5 or 24h at 37°C in ambient or 10% CO<sub>2</sub> atmosphere.

### Mutant strain construction.

Oligonucleotide primers used in this study were previously described [17, 19, 23]. The oligonucleotide primers were designed according to the genomic sequence of *B. anthracis* Ames strain. Genomic DNA (containing the chromosomal DNA and the native plasmids, pX01 and pX02) for cloning the target gene fragments was extracted from the Vollum strain as previously described [24]. Target genes were disrupted by homologous recombination, using a previously described method [25]. In general, gene deletion or insertion was accomplished by a marker-less allelic exchange technique that replaced the complete coding region with the *SpeI* restriction site or the desired sequence. At the end of the procedure the resulting mutants did not code for any foreign sequences and the only modification is the desired gene insertion or deletion. Deletion of the *atxA* gene was performed as previously described [25]. All the mutants were tested for their ability to produce capsule by incubation in modified DMEM. The capsule was visualized by negative staining with India ink.

### Toxin quantification

Protective antigen (PA) concentration was determined by capture ELISA using the combination of a polyclonal and monoclonal αPA antibodies as previously described [23]

125

**Table 1: Bacterial strains used in this study**

| Strain                                                                                | Description/characteristics                                                                                                                                                       | Source          |
|---------------------------------------------------------------------------------------|-----------------------------------------------------------------------------------------------------------------------------------------------------------------------------------|-----------------|
| <b><i>B. anthracis</i></b>                                                            |                                                                                                                                                                                   |                 |
| Vollum                                                                                | ATCC 14578                                                                                                                                                                        | IIBR collection |
| VollumΔpXO1                                                                           | Complete deletion of the plasmid pXO1                                                                                                                                             | IIBR collection |
| VollumΔatxA                                                                           | Complete deletion of the <i>atxA</i> gene                                                                                                                                         | This study      |
| VollumΔacpA                                                                           | Complete deletion of the <i>acpA</i> gene                                                                                                                                         | [17]            |
| VollumΔacpB                                                                           | Complete deletion of the <i>acpB</i> gene                                                                                                                                         | [17]            |
| VollumΔacpAΔacpB                                                                      | Complete deletion of the <i>acpA</i> and <i>acpB</i> genes                                                                                                                        | [17]            |
| VollumΔpagΔcyaΔlef                                                                    | Complete deletion of the <i>pag</i> , <i>lef</i> and <i>cya</i> genes                                                                                                             | [23]            |
| VollumΔpagΔcyaΔlefΔacpA                                                               | Complete deletion of the <i>acpA</i> gene in the VollumΔpagΔcyaΔlef mutant                                                                                                        | [17]            |
| VollumΔpagΔcyaΔlefΔacpB                                                               | Complete deletion of the <i>acpB</i> gene in the VollumΔpagΔcyaΔlef mutant                                                                                                        | [17]            |
| VollumΔpagΔcyaΔlefΔacpAΔacpB                                                          | Complete deletion of the <i>acpA</i> and <i>acpB</i> genes in the VollumΔpagΔcyaΔlef mutant                                                                                       | [17]            |
| VollumΔpagΔcyaΔlefΔacpAΔatxA                                                          | Complete deletion of the <i>atxA</i> gene in the VollumΔpagΔcyaΔlefΔacpA mutant                                                                                                   | This study      |
| VollumΔpagΔcyaΔlefΔacpBΔatxA                                                          | Complete deletion of the <i>atxA</i> gene in the VollumΔpagΔcyaΔlefΔacpB mutant                                                                                                   | This study      |
| VollumΔpXO2 Δ <i>bclA</i> :: <i>pag<sub>prom</sub></i> :: <i>capA-E</i>               | Genome insertion of the <i>pagA</i> promoter in front of the CAP operon replacing the <i>bclA</i> gene in the VollumΔpXO2                                                         | [17]            |
| VollumΔpXO2 Δ <i>bclA</i> :: <i>pag<sub>prom</sub></i> :: <i>capA-E</i> Δ <i>atxA</i> | Deletion of the <i>atxA</i> gene from the strain having genome insertion of the <i>pagA</i> promoter in front of the CAP operon replacing the <i>bclA</i> gene in the VollumΔpXO2 | [17]            |

126

127

## Results

**The effect of supplements and growth condition on capsule production in sDMEM medium.** The basic medium that we used to test capsule and toxins induction in response to different supplements and growth condition was high glucose DMEM that was supplanted with glutamine, pyruvate and non-essential amino acid and is referred to as sDMEM. Since we chose to grow the bacteria in 96 well tissue culture microplate we tested the effect of volume on capsule production. We have inoculated *B. anthracis* Vollum spores ( $5 \times 10^5$  CFU/ml) in 100 $\mu$ l, 200 $\mu$ l and 300 $\mu$ l sDMEM at 37°C in ambient atmosphere for 24h. No capsule production could be detected in 100 $\mu$ l sDMEM (Figure 1) but increasing the culture volume to 300 $\mu$ l results in capsule production were in 200 $\mu$ l only part of the bacteria were encapsulated (Figure 1). This effect could result from dissolved CO<sub>2</sub> generated by bacterial growth and limited gas exchange in the case of low surface to liquid volume. This is supported by the finding that growth in 10% CO<sub>2</sub> atmosphere induces capsule accumulation even in medium volume of 100 $\mu$ l sDMEM (Figure 1). Normal rabbit serum (NRS) induces capsule accumulation regardless of atmosphere composition, since all the bacteria were encapsulated in ambient or 10% CO<sub>2</sub> atmosphere (Fig 1). Based on these experiments we used 100 $\mu$ l sDMEM medium in 96 well tissue-culture plates for all of our induction experiments.

143

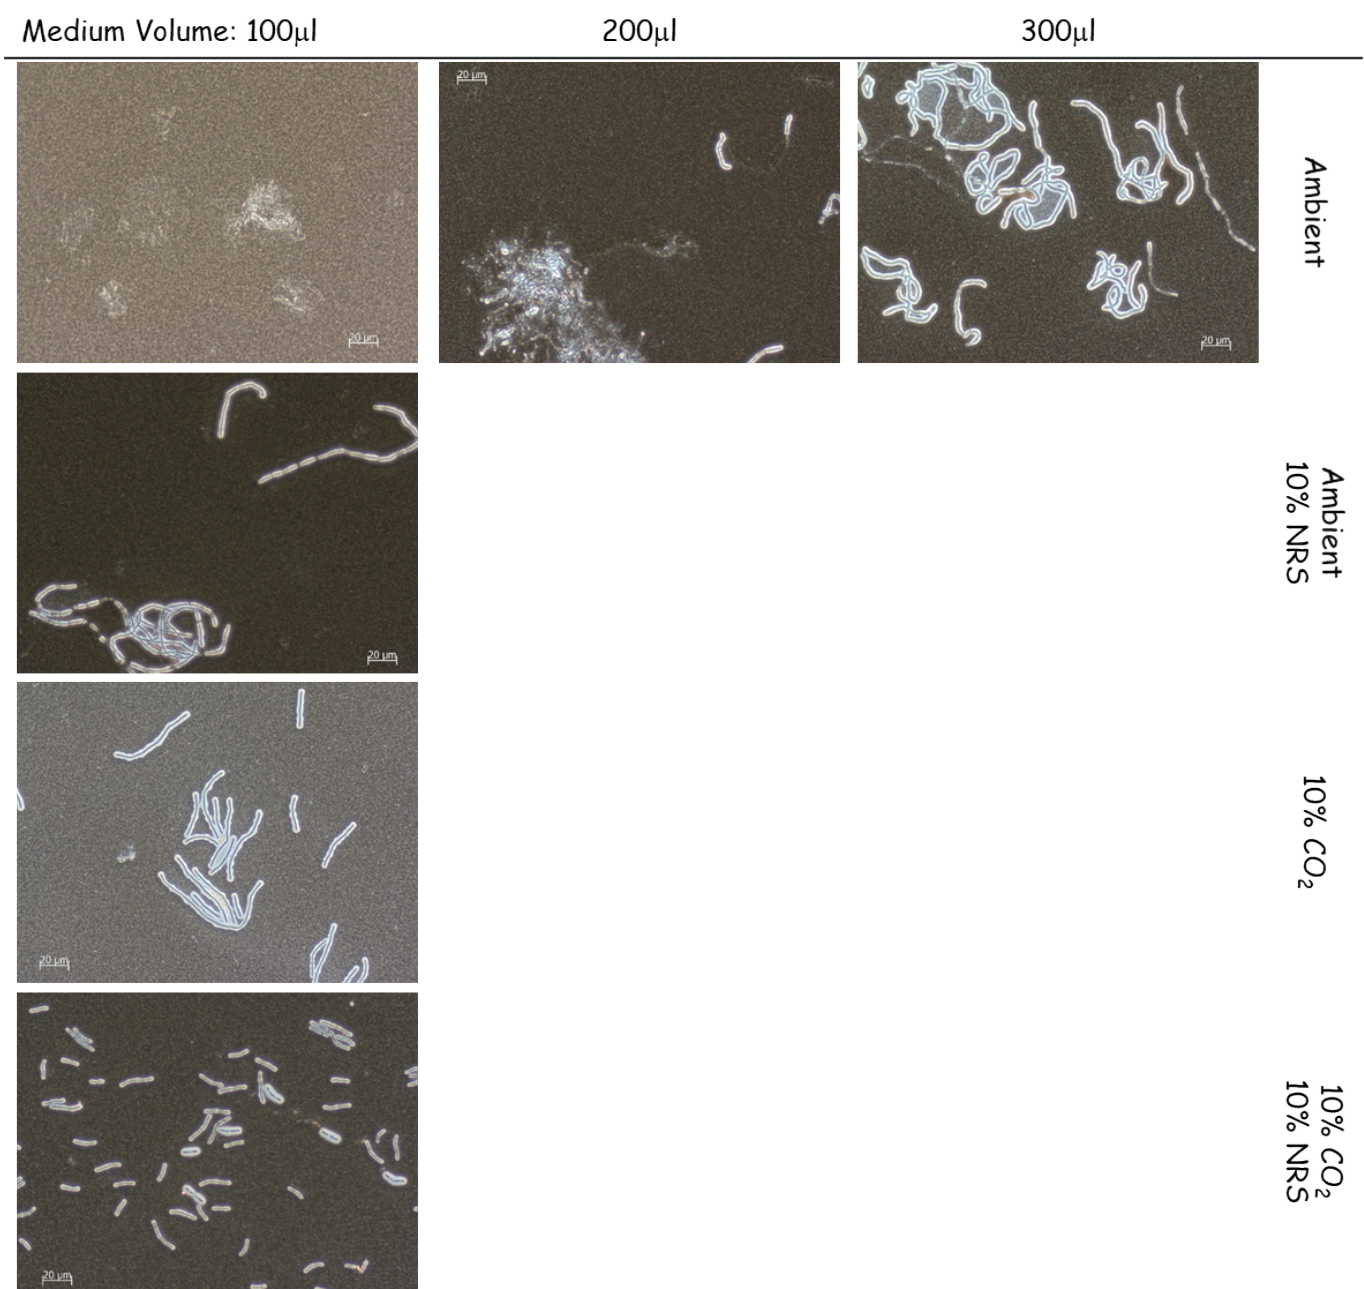

144 **Figure 1. The effect of growth conditions on capsule accumulation by *B. anthracis* Vollum.** Spores  
145 were seeded into 100μl, 200μl or 300μl of DMEM and incubated at 37°C in an ambient atmosphere (upper panel) for  
146 24h. To examine the effect of serum or CO<sub>2</sub> on capsule production, spores were seeded into 100μl DMEM as is or  
147 supplemented with 10% NRS and incubated at 37°C in an ambient or 10% CO<sub>2</sub> atmosphere (as indicated on the right)  
148 for 24h. The presence or absence of capsule were determined by India ink negative staining (capsule seen as a bright  
149 outer layer).

150 **The role of *atxA* on capsule production and toxin secretion under different growth conditions.** To  
151 test the role of *atxA* on capsule and toxins production following growth in sDMEM under the different  
152 growth conditions we compared the wild type Vollum strain to the ΔpXO1 or Δ*atxA* mutants. None of the



153 strains produced capsule under ambient atmosphere in the un-supplemented sDMEM medium (Figure 2).  
 154 Addition of 10% NRS resulted in capsule production by the wild type Vollum strain but not by the *atxA*  
 155 null mutants ( $\Delta pXO1$  or  $\Delta atxA$  Figure 2). In a 10%  $CO_2$  atmosphere all the strains were encapsulated  
 156 regardless of the presence or absence of *atxA*. Hence, the effect of NRS in the presence of  $CO_2$  on  
 157 capsule production under these conditions could not be resolved since capsule production is induced in  
 158 response to the presence of  $CO_2$  or NRS. Since it appeared that the response to NRS is *atxA* dependent  
 159 we can assume that capsule production in the *atxA* null mutants derived from only the  $CO_2$  (Figure 2).

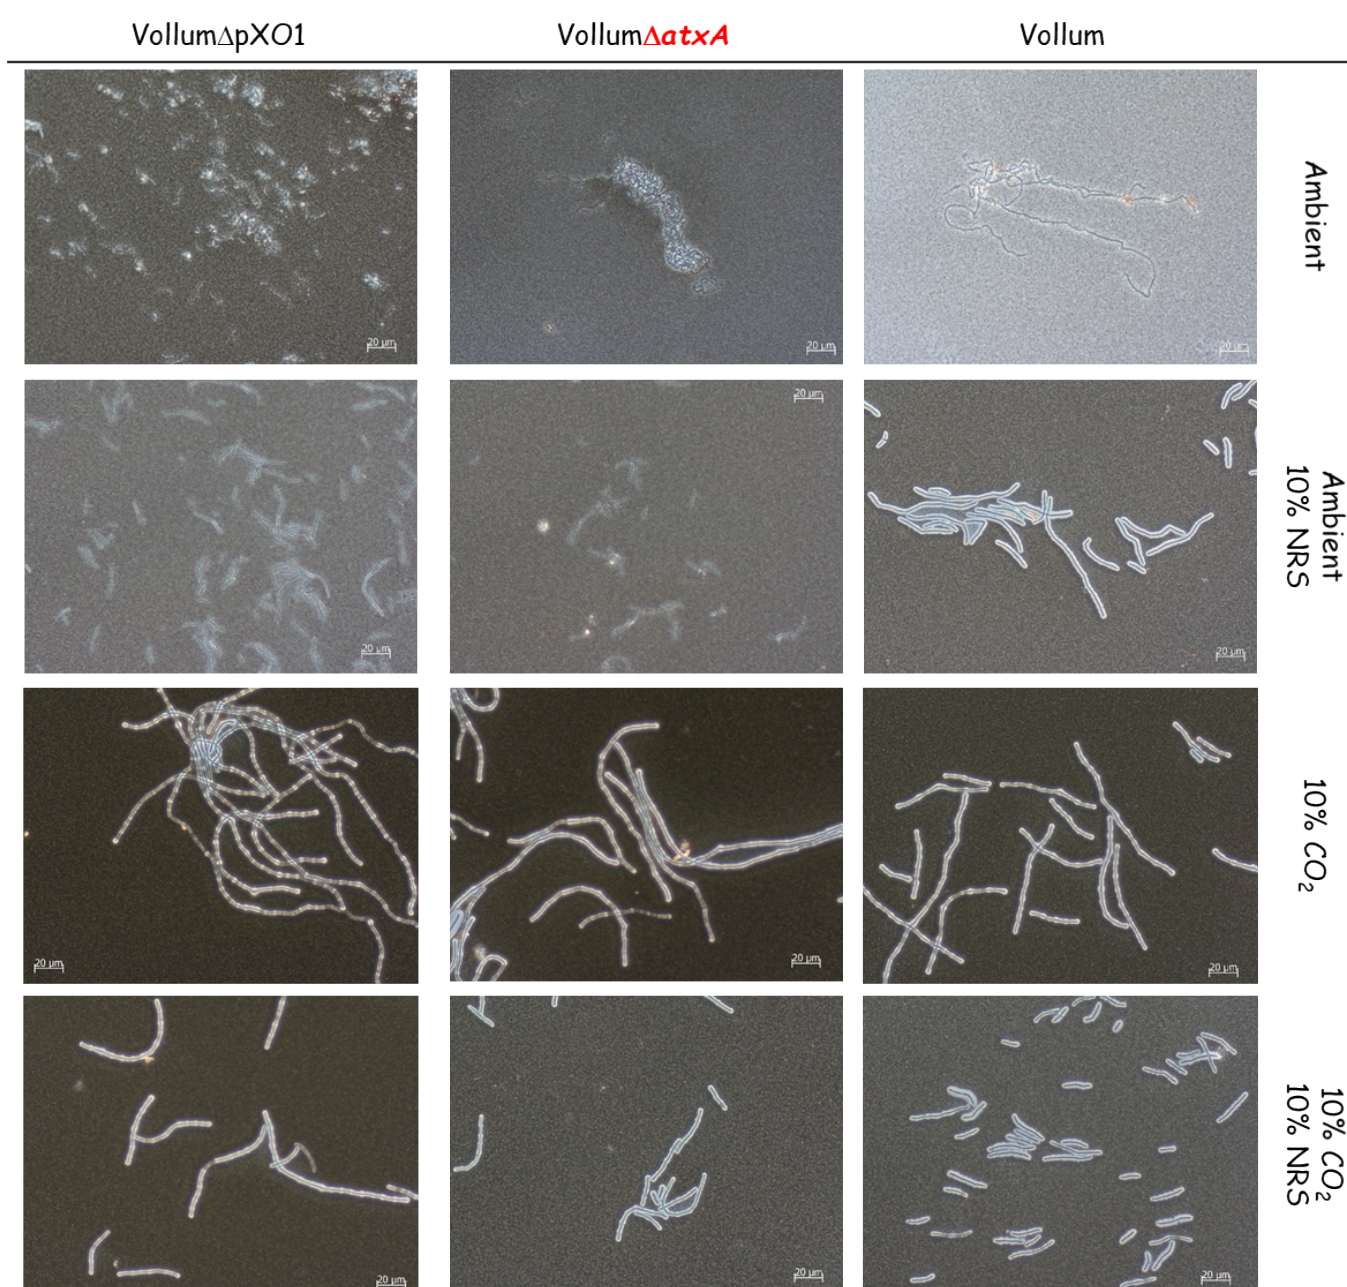

160  
 161 Figure 2. Capsule production of the Vollum wild type,  $\Delta pXO1$  or  $\Delta atxA$  mutants under different growth  
 162 conditions. The effect of the absence of *pXO1* or the *atxA* gene on capsule accumulation under the different growth

conditions, Spores of the wild type and different mutants (top panel) were seeded into 100µl of DMEM as is or supplemented with 10% NRS and incubated at 37°C in an ambient or 10% CO<sub>2</sub> atmosphere (as indicated on the right) for 24h. The presence or absence of capsule were determined by India ink negative staining (capsule seen as a bright outer layer).

As *atxA*, the major virulence regulator is regulating the toxins expression (LF, EF and PA), we determined the concentration in the growth medium of the Vollum and VollumΔ*atxA* mutant (in Δ*pXO1* all the tox genes are missing). Toxins secretion was determined by ELISA of the most abundant component, the PA. PA was detected only when the growth medium was supplemented with NRS (Table 1). According to our results (Table 1), CO<sub>2</sub> enriched atmosphere reduced the PA levels to about 30%, reduction that was maintained through different independent experiments. However, we cannot eliminate the possibility that this difference results from differences in growth rates under these conditions. No PA secretion could be detected in the *atxA* null mutant under any of the tested growth conditions.

The fact that we find that CO<sub>2</sub> atmosphere by itself do not activate *atxA* dependent toxin induction, is surprising since it was repeatedly demonstrated that *atxA* is regulated by HCO<sub>3</sub><sup>-</sup>. Therefore, we tested capsule production and toxin secretion in a sDMEM supplemented with 0.75% HCO<sub>3</sub><sup>-</sup> in 10% CO<sub>2</sub> atmosphere. The CO<sub>2</sub> atmosphere was chosen since the addition of HCO<sub>2</sub><sup>-</sup> dramatically increase the levels of the soluble CO<sub>2</sub> in the medium even under ambient conditions and we were interested to maintain the controls in as close conditions as possible.

Table 1. Protective Antigen secretion of Vollum or VollumΔ*atxA* under different growth conditions.

|          | VollumΔ <i>atxA</i> | Vollum | Atmosphere          | Supplements |
|----------|---------------------|--------|---------------------|-------------|
| PA µg/ml | <0.1                | <0.1   | Ambient             |             |
|          | <0.1                | 8.7    | Ambient             | 10% NRS     |
|          | <0.1                | <0.1   | 10% CO <sub>2</sub> |             |
|          | <0.1                | 2.6    | 10% CO <sub>2</sub> | 10% NRS     |



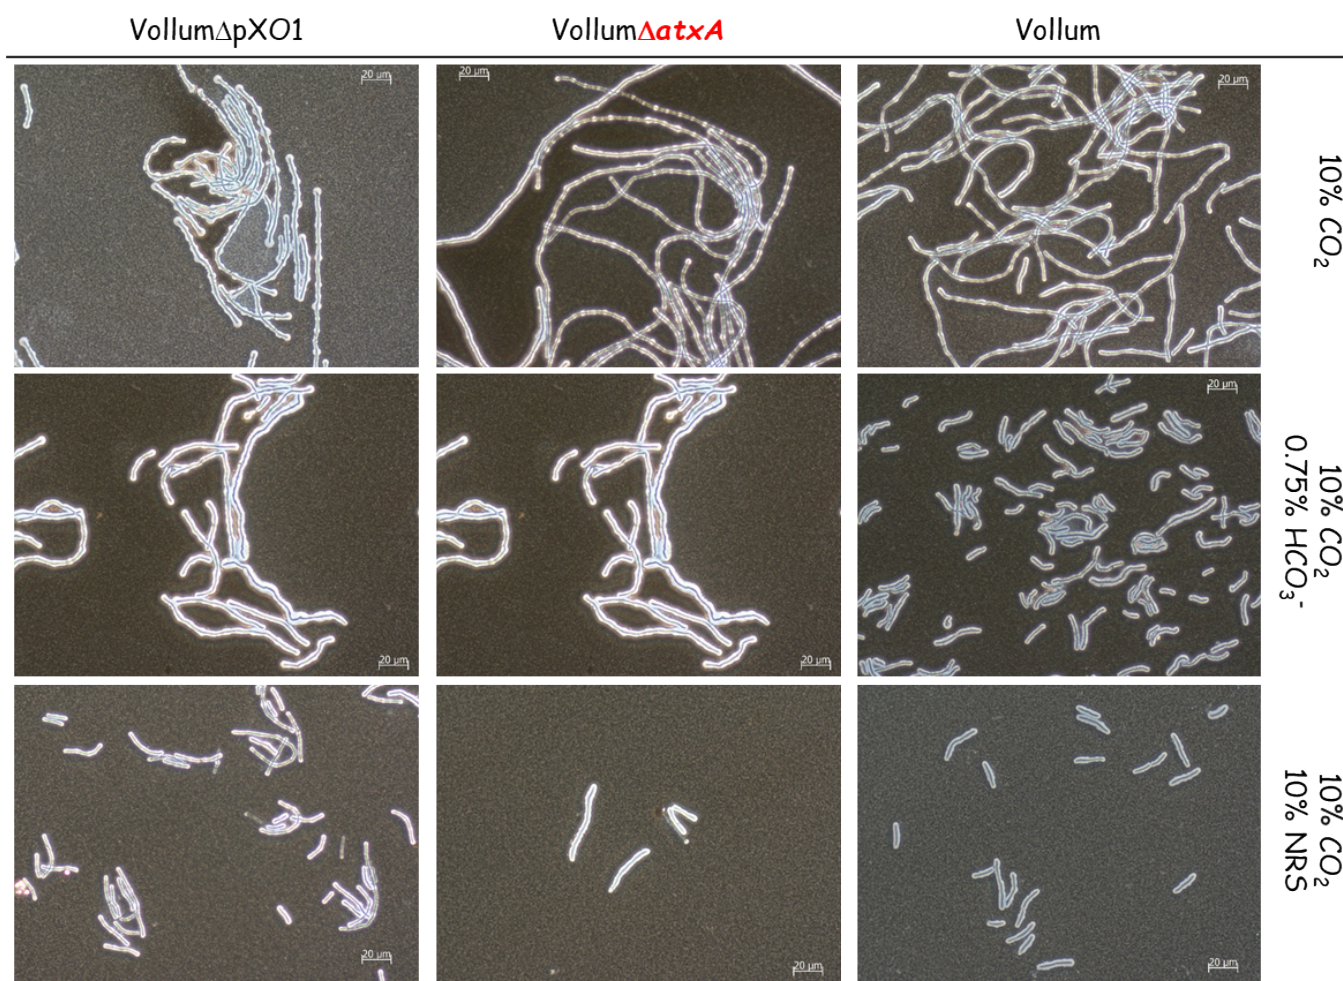

185 **Figure 3. Effect of 0.75% HCO<sub>3</sub><sup>-</sup> on capsule accumulation of *Vollum*, *Vollum*ΔatxA or *Vollum*ΔpXO1. Spores**  
 186 **were seeded into 100μl of DMEM as is or supplemented with 0.75% HCO<sub>3</sub><sup>-</sup> or 10%NRS and incubated at 37°C in an**  
 187 **atmosphere of 10% CO<sub>2</sub> for 24h. The presence or absence of capsule were determined by India ink negative staining**  
 188 **(capsule seen as a bright outer layer). The different mutations are indicated (top panel).**

189

190 **Table 2. PA secretion by *Vollum* and *Vollum*ΔatxA in medium supplemented with HCO<sub>3</sub><sup>-</sup>**

|          | <i>Vollum</i> ΔatxA | <i>Vollum</i> | Atmosphere          | Supplements                         |
|----------|---------------------|---------------|---------------------|-------------------------------------|
| PA μg/ml | <0.1                | <0.1          | 10% CO <sub>2</sub> |                                     |
|          | <0.1                | 3.12          | 10% CO <sub>2</sub> | 0.75% HCO <sub>3</sub> <sup>-</sup> |
|          | <0.1                | 5.3           | 10% CO <sub>2</sub> | 10% NRS                             |

191

192 As we demonstrated capsule accumulation is CO<sub>2</sub> dependent, therefore all the strains are encapsulated  
 193 under all the condition tested (**Figure 3**). PA secretion was tested only in the growth medium of *Vollum*  
 194 and *Vollum*ΔatxA. Supplementing the sDMEM with 0.75% HCO<sub>3</sub><sup>-</sup> induced PA secretion by the *Vollum* strain  
 195 but not by the *Vollum*ΔatxA mutant, indicating that HCO<sub>3</sub><sup>-</sup> induce toxin secretion in an atxA dependent  
 196 manner (**Table 2**). To validate these findings, we used a previously reported *Vollum*ΔpXO2 chimera in



197 which we substituted the genomic *bclA* gene with a  $PA_{prom}$  regulated CAP operon. In this case capsule  
198 accumulation is an indication for *atxA* dependent activation of the PA promotor that activates the CAP  
199 genes.

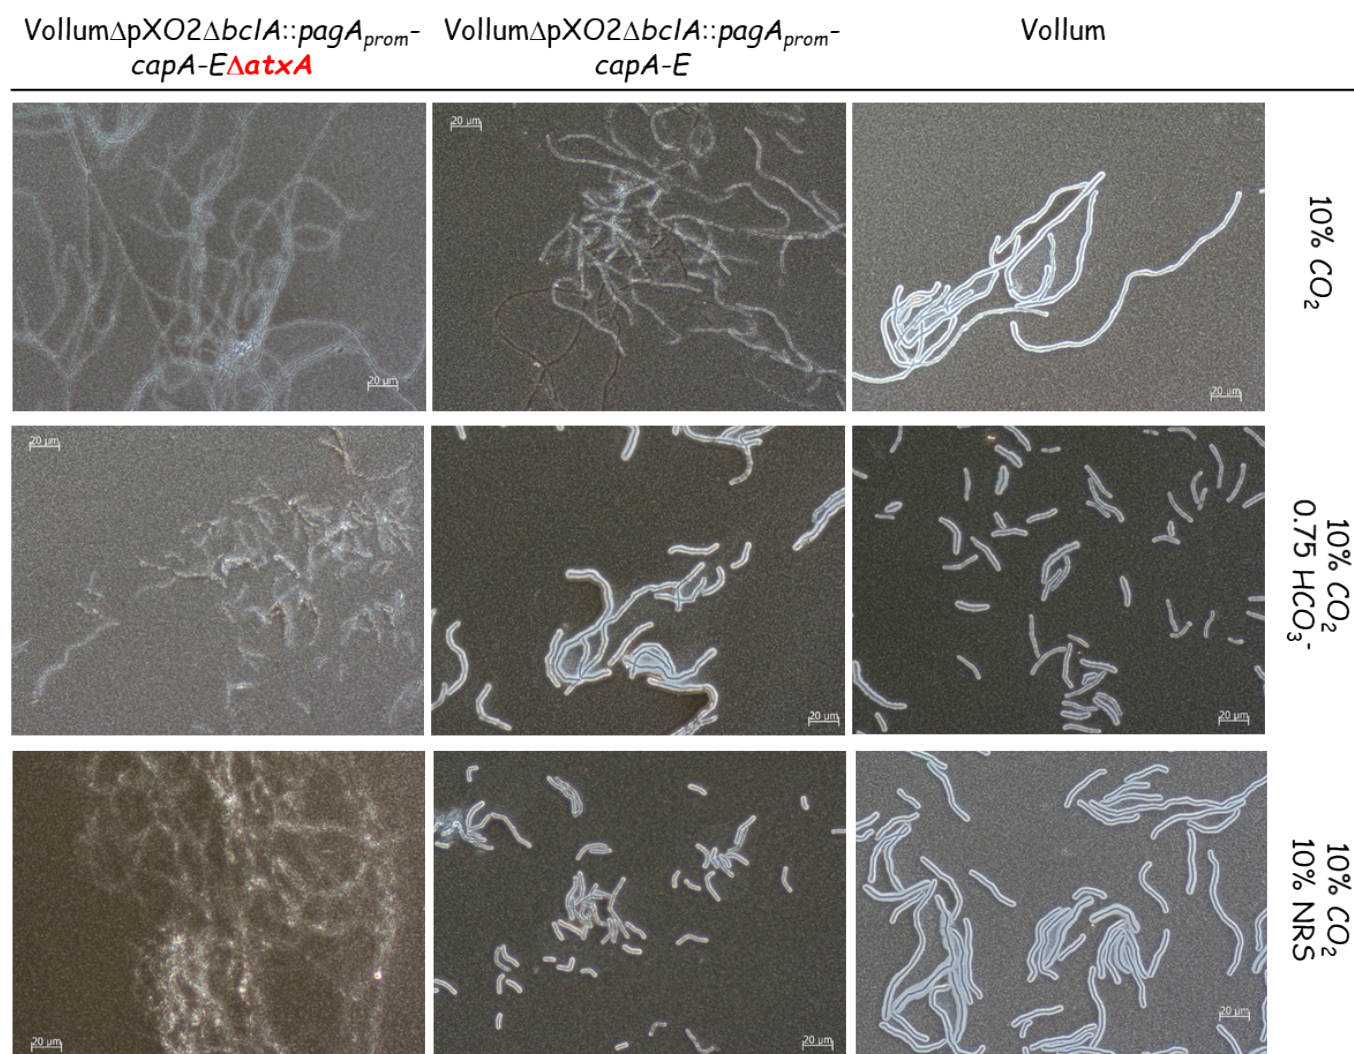

200 **Figure 4. Capsule accumulation in response to HCO<sub>3</sub><sup>-</sup> in a  $PA_{prom}$ - regulated genome cluster of CAP operon.**  
201 Spores were seeded into 100μl of DMEM as is or supplemented with 0.75% HCO<sub>3</sub><sup>-</sup> or 10%NRS and incubated at 37°C  
202 in an atmosphere of 10% CO<sub>2</sub> for 24h. The presence or absence of capsule were determined by India ink negative  
203 staining (capsule seen as a bright outer layer). The different mutations are indicated (top panel).

204  
205 While 10% CO<sub>2</sub> atmosphere induce capsule production in the Vollum wild type strain little or no capsule  
206 production could be detected in the Vollum $\Delta pXO2$  chimeric strain (**Figure 4**). Supplementing the media  
207 with 0.75% HCO<sub>3</sub><sup>-</sup> to the growth medium results in capsule accumulation in the Vollum and Vollum $\Delta pXO2$   
208 chimera, however deletion of the *atxA* resulted in capsule loss of the Vollum $\Delta pXO2$  chimeric strain (**Figure**  
209 **4**). Same results were obtained by supplementing the medium with 10% NRS. These results support the  
210 PA secretion experiment that indicate that HCO<sub>3</sub><sup>-</sup> and NRS are inducing toxin secretion in an *atxA*  
211 dependent manner.



212

213 **The effect of short incubation on capsule and toxins accumulation in response the different growth**  
 214 **conditions.** Aerobic growth affects different parameters of the liquid medium such as pH and O<sub>2</sub>/CO<sub>2</sub>  
 215 concentrations especially when the bacteria reaches high concentration (CFU/ml). As was shown  
 216 previously, capsule production and toxins secretion can be detected following 2- 5h of growth in sDMEM  
 217 in 10% CO<sub>2</sub> atmosphere. To eliminate as much as possible the changes in media condition as result of  
 218 bacterial growth we examine capsule production and PA secretion following 5h growth in different growth  
 219 conditions. Growth of the Vollum strain in ambient condition did not result in any capsule accumulation or  
 220 toxin secretion following 24h incubation (Figure 2, Table 1) or a short 5h incubation (Figure 5, Table 3).  
 221 Supplementing the media with 10% NRS induced capsule production and PA secretion flowing 24h  
 222 incubation in ambient atmosphere (Figure 2, Table 1). Examination these parameters following a shorter,  
 223 5h incubation, demonstrating PA accumulation (Table 3) but no capsule accumulation (Figure 5). This PA  
 224 accumulation is AtxA dependent as deletion of the *atxA* gene resulted in no PA accumulation following 5h  
 225 (Table 3) or 24h incubation (Table 1). Incubating the bacteria in 10% CO<sub>2</sub> atmosphere for 5h result in  
 226 capsule accumulation (Figure 5) the same as was observed following a 24h incubation (Figures 1-3). This  
 227 capsule accumulation was *atxA* independent and was not dramatically affected by the addition of 10%NRS  
 228 or HCO<sub>3</sub><sup>-</sup> (Figure 5). PA secretion was not induced by 10%CO<sub>2</sub> per se buy required addition of NRS or  
 229 HCO<sub>3</sub><sup>-</sup> (Table 3), however unlike the 24h incubation (Table 2), the PA that was secreted in respond to  
 230 HCO<sub>3</sub><sup>-</sup> was less than 10% of that induced by NRS (Table 3). Under all conditions the PA secretion was  
 231 AtxA dependent.

232

233

234

235

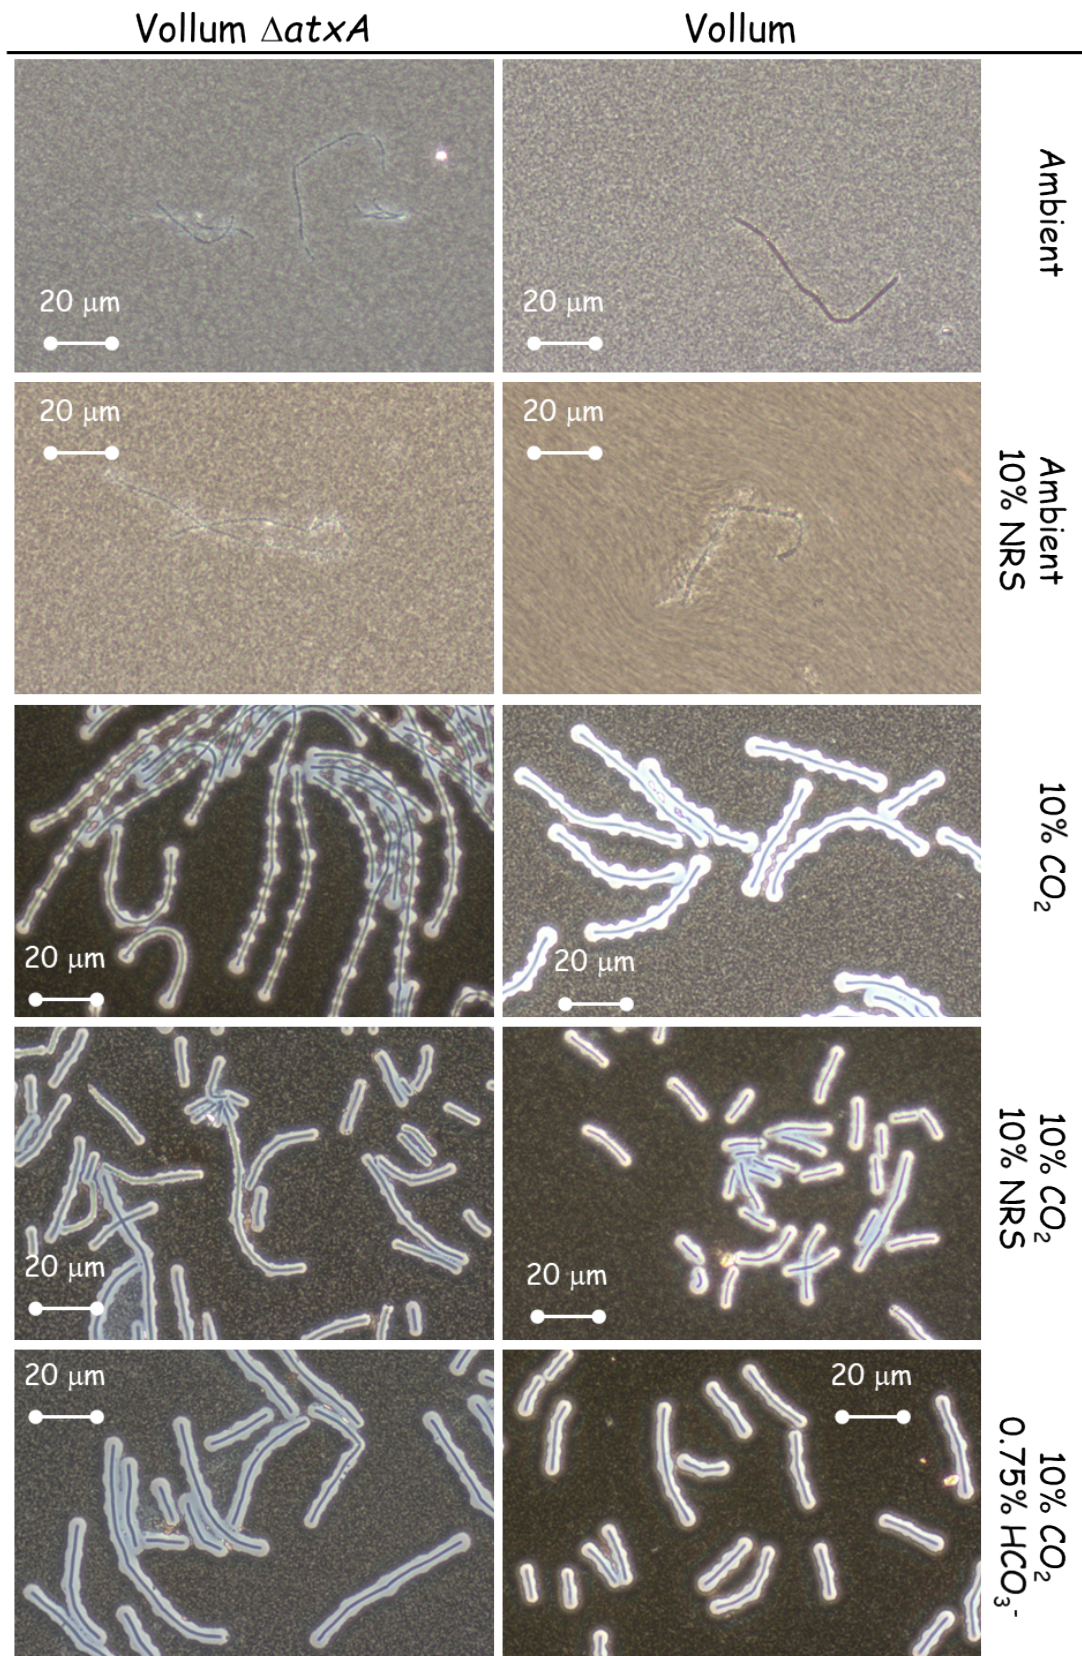

Figure 5. Effect of the absence of *atxA* gene on capsule accumulation after short (5h) growth under the different growth conditions. Spores of the wild type and  $\Delta atxA$  mutant (top panel) were seeded into 100μl of DMEM as is or supplemented with 10% NRS and incubated at 37°C in an ambient or 10% CO<sub>2</sub> atmosphere (as indicated

on the right) for 24h. The presence or absence of capsule were determined by India ink negative staining (capsule seen as a bright outer layer).

Table 3. PA secretion by Vollum and Vollum $\Delta$ atxA flowing 5h growth in different conditions

|               | Vollum $\Delta$ atxA | Vollum | Atmosphere          | Supplements                         |
|---------------|----------------------|--------|---------------------|-------------------------------------|
| PA $\mu$ g/ml | <0.1                 | <0.1   | Ambient             |                                     |
|               | <0.1                 | 1.89   | Ambient             | 10% NRS                             |
|               | <0.1                 | <0.1   | 10% CO <sub>2</sub> |                                     |
|               |                      | 4.25   | 10% CO <sub>2</sub> | 10% NRS                             |
|               |                      | 0.29   | 10% CO <sub>2</sub> | 0.75% HCO <sub>3</sub> <sup>-</sup> |

**Regulation of *acpA* and *acpB* in response to different growth conditions.** As toxin production is induced in an *atxA* dependent manner in response to HCO<sub>3</sub><sup>-</sup> or NRS, capsule production is also induced by CO<sub>2</sub> enriched (10%) atmosphere. Since capsule production is regulated by two regulatory proteins, AcpA and AcpB, we tested the effect of the deletion of each on of these genes on capsule accumulation in response to the different growth conditions. The complete coding region of *acpA* or *acpB* was deleted independently in the wild type Vollum or the toxin deficient mutant Vollum $\Delta$ Tox (ref). As was previously shown for the wide type Vollum strain (Figure 2) none of these mutants accumulate capsule flowing growth in sDMEM with ambient atmosphere (Figure 6). The presence of *acpA* or *acpB* is sufficient for capsule accumulation in sDMEM supplemented with 10% NRS, regardless to the presence or absence of 10% CO<sub>2</sub> atmosphere (Figure 6). However, in the absence of NRS, only AcpA expressing mutants accumulate significant capsule when grown in 10% CO<sub>2</sub> atmosphere. 0.75% HCO<sub>3</sub><sup>-</sup> induced capsule accumulation in the presence of *acpA* or *acpB*. Mutants deleted of *acpA* (expressing only *acpB*), did not accumulate significant capsule in 10% CO<sub>2</sub> atmosphere. To examine the role of *atxA* in these processes, we deleted the *atxA* gene in our Vollum $\Delta$ Tox $\Delta$ *acpA* or  $\Delta$ *acpB* mutants. Deleting the  $\Delta$ *atxA* in the Vollum $\Delta$ Tox $\Delta$ *acpA*, which express only the *acpB*, abolishes capsule accumulation under all tested conditions (Figure 7). However, deleting the *atxA* gene in the Vollum $\Delta$ Tox $\Delta$ *acpB*, which express only *acpA* did not affect capsule accumulation, relative to the *atxA* expressing mutant, indicating that *acpA* operates in an *atxA* independent manner (Figure 7).

As we demonstrated (Figure 2), capsule accumulation could be induced in ambient atmosphere by adding 10% NRS to the growth media. This induction is AtpA dependent since no capsule accumulation was detected in the Vollum $\Delta$ atxA mutant under these conditions (Figure 2). Since AcpA dependent capsule accumulation in 10% CO<sub>2</sub> atmosphere was AtpA independent, we tested the role of AtpA on AcpA dependent capsule accumulation in response to 10% NRS in ambient atmosphere. As 10% NRS induces capsule accumulation of Vollum $\Delta$ acpB in ambient atmosphere (Figure 6, Figure 8) we tested the effect



of *atxA* deletion on capsule accumulation under these conditions. Unlike the  $\text{CO}_2$  induction, in ambient atmosphere, AcpA dependent capsule accumulation in response to NRS is AtxA dependent (Figure 8).

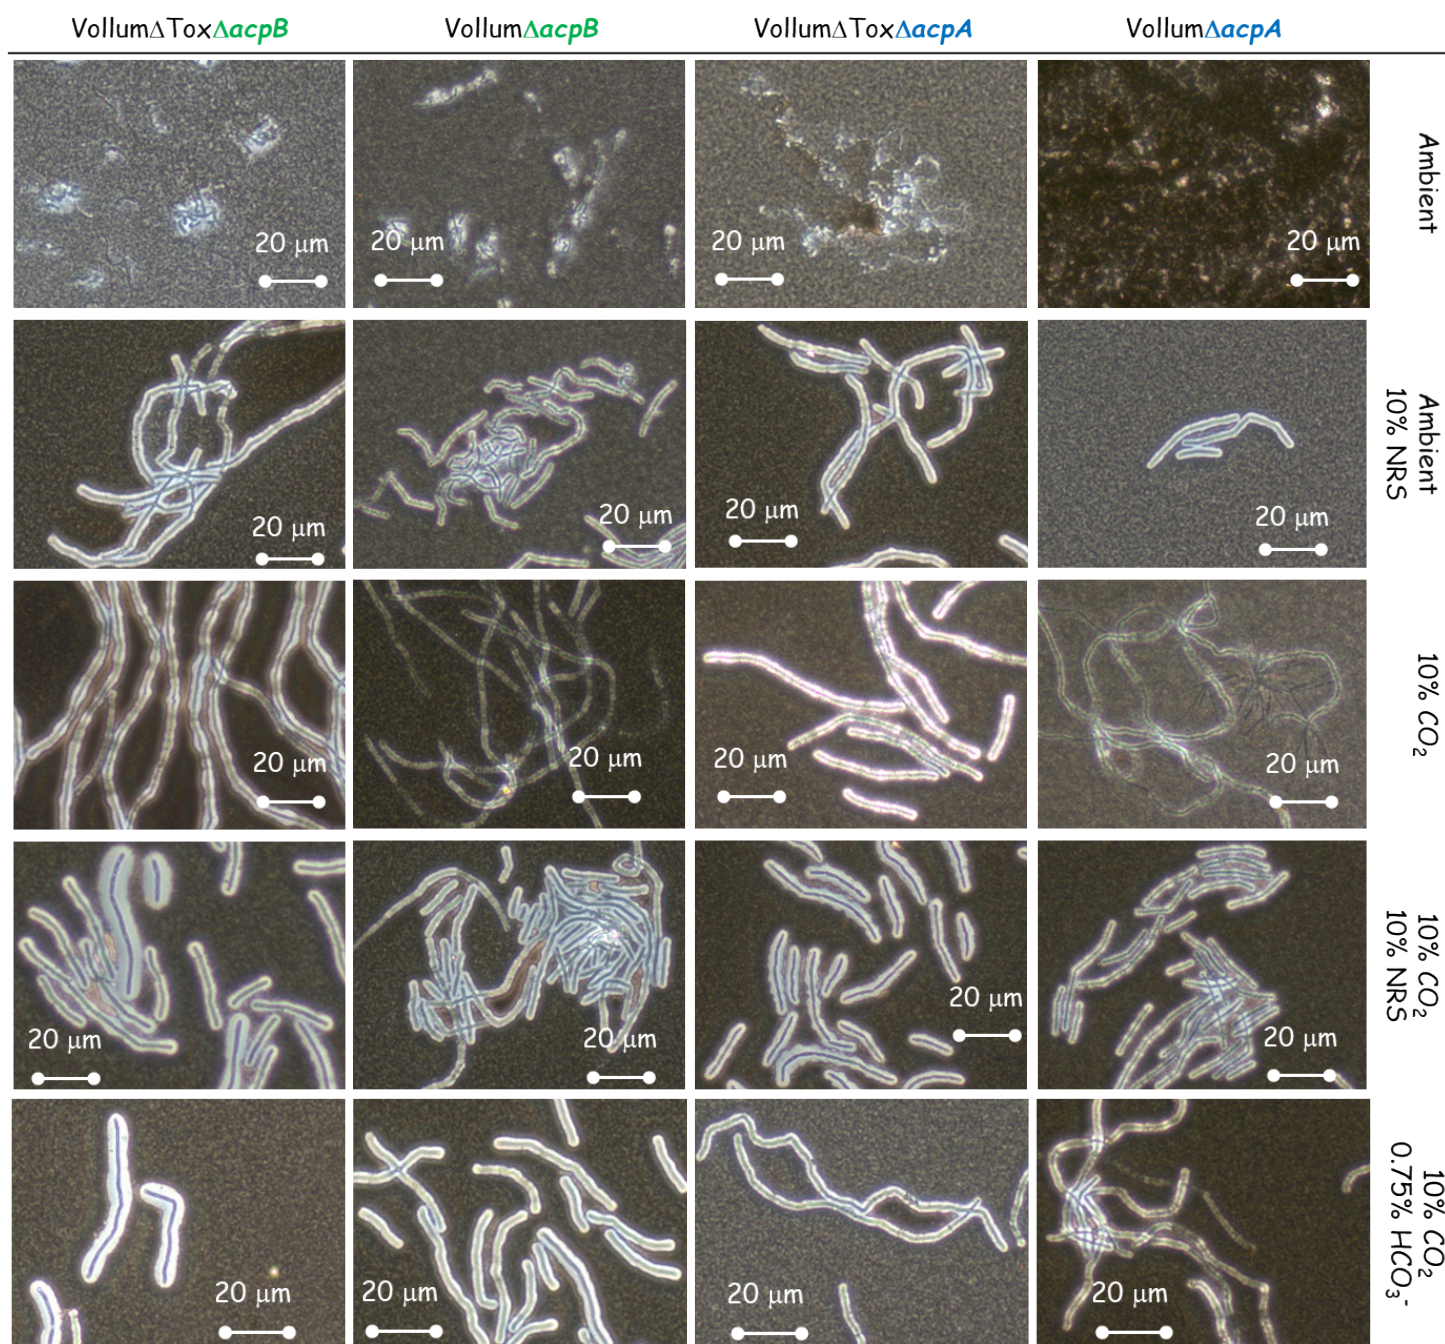

Figure 6. The effect of absence of *acpA* or *acpB* on capsule accumulation in response to 10% NRS in an ambient or 10%  $\text{CO}_2$  atmosphere. Spores of the  $\Delta$ acpA or *acpB* mutants (top panel) were seeded into 100 $\mu$ l of DMEM as is or supplemented with 0.75%  $\text{HCO}_3^-$  or 10% NRS and incubated at 37°C in an ambient or 10%  $\text{CO}_2$  atmosphere (as indicated on the right) for 24h. The presence or absence of capsule were determined by India ink negative staining (capsule seen as a bright outer layer).



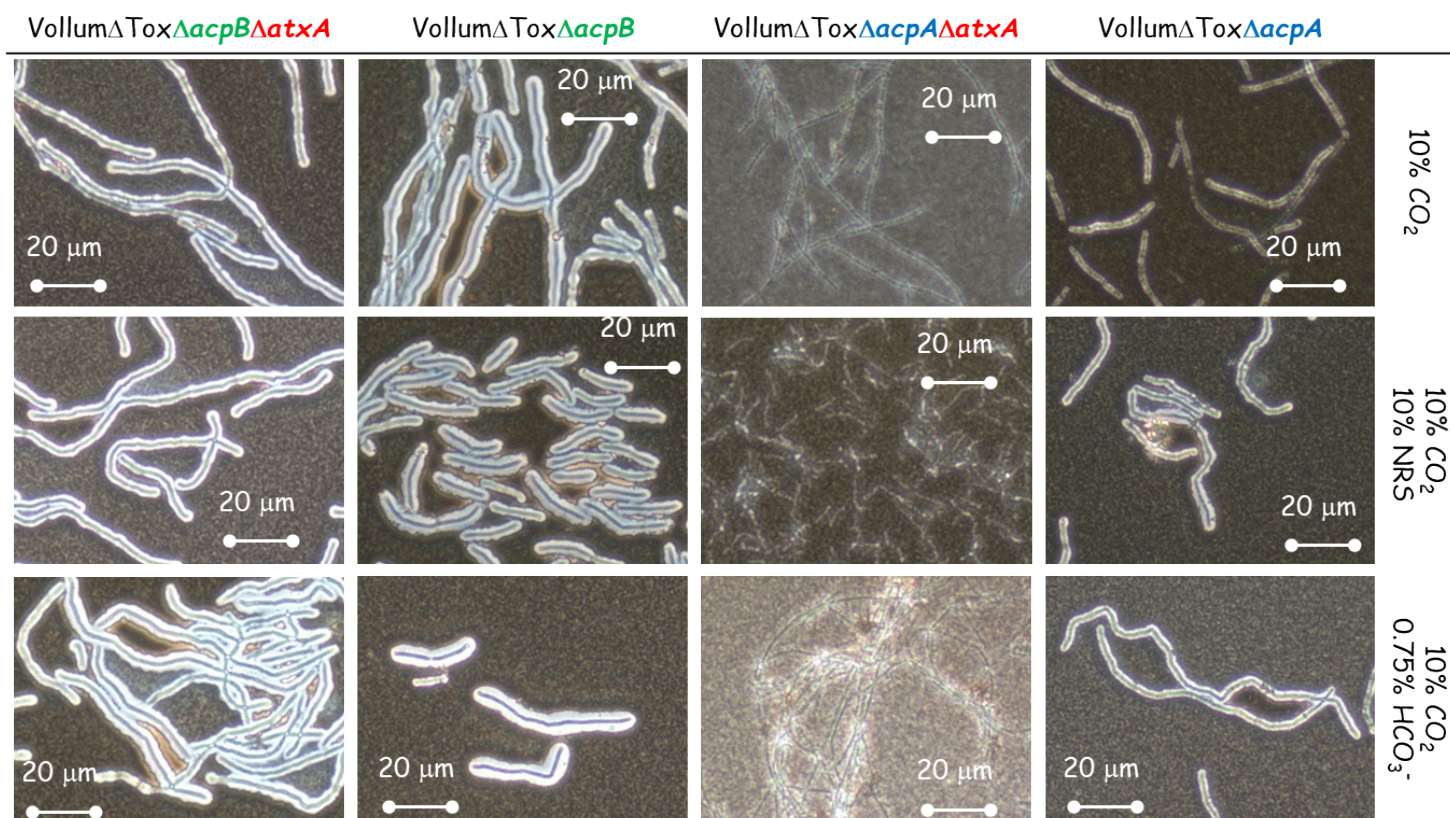

Figure 7. Effect of AtxA on Capsule accumulation in the presence of only AcpA or AcpB. Spores of the different mutants (top panel) were seeded into 100 $\mu$ l of DMEM as is or supplemented with 0.75% HCO<sub>3</sub><sup>-</sup> or 10% NRS and incubated at 37°C in 10% CO<sub>2</sub> atmosphere (as indicated on the right) for 24h. The presence or absence of capsule were determined by India ink negative staining (capsule seen as a bright outer layer).

281

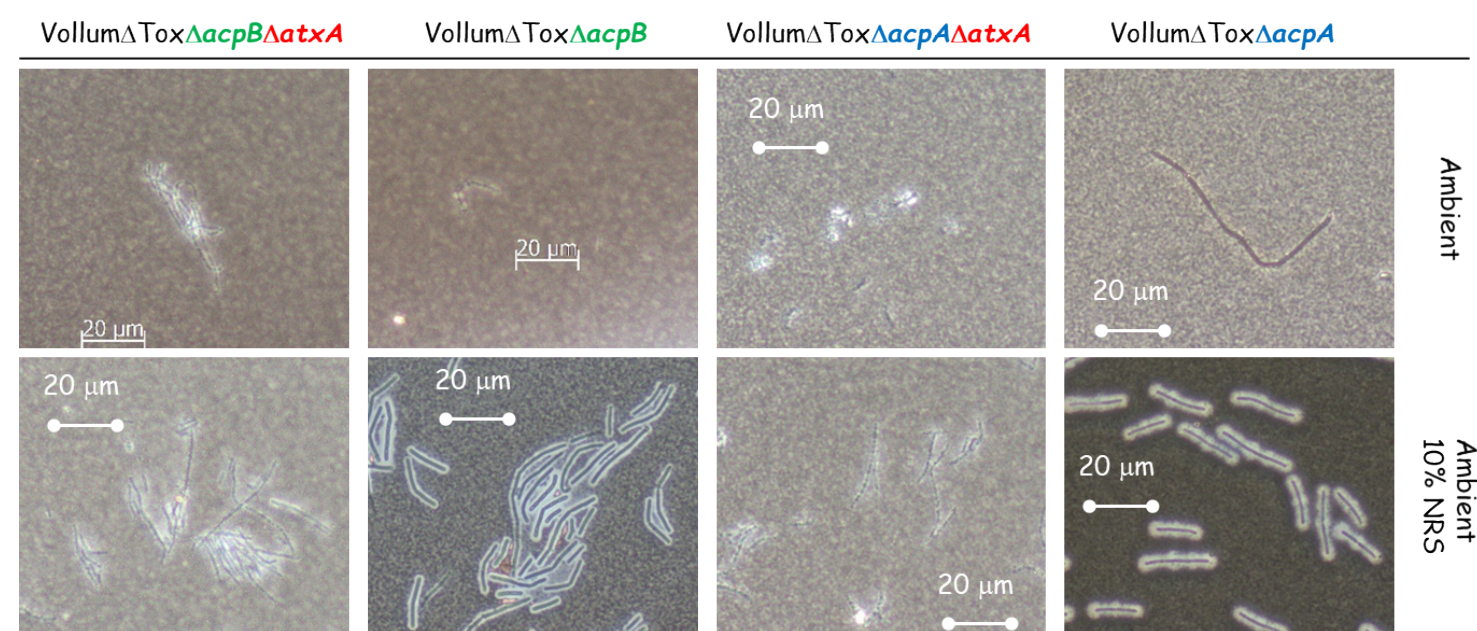

Figure 8. Effect of AtxA on Capsule accumulation in response to 10% NRS in ambient atmosphere. Spores of the different mutants (top panel) were seeded into 100 $\mu$ l of DMEM as is or supplemented with 10% NRS and

284 incubated at 37°C in ambient atmosphere (as indicated on the right) for 24h. The presence or absence of capsule  
285 were determined by India ink negative staining (capsule seen as a bright outer layer).

286

287

288

## Discussion

For successful invasion the pathogen must regulate its virulence factors in a way that will maximize their effect on the host defense mechanisms. The trigger of such activation is usually host derived and can be biological (such as proteins) or physical (pH or temperature for example). *B. anthracis* naturally infect humans following spore inhalation, contact with broken skin or ingestion of undercooked contaminated meat, in each of them the bacteria faces different environmental conditions [2]. It was previously demonstrated that toxins secretion and capsule accumulation could be induced by growing the bacteria in culture media supplemented with  $\text{HCO}_3^-$  or serum (10-50%) in a  $\text{CO}_2$  enriched (5-15%) atmosphere [5, 16, 18, 19, 26-28].  $\text{HCO}_3^- / \text{CO}_2$  condition were used to study in most studies of *atxA*, *acpA* and *acpB* regulation and their effect on toxins and capsule biosynthetic genes [16, 18, 29]. Since these conditions always included these two components it was concluded that *atxA* was induced in response to  $\text{CO}_2$  and regulate the induction of *acpA* and *acpB*. Although in some reports, capsule accumulation was shown to be *atxA* dependent [16, 30], the fact that  $\Delta\text{pXO1}$  variants are encapsulated contradict this finding, indicating additional *atxA* independent regulation of the process [19, 26]. The use of sDMEM as a growth media enabled the examination of the effect of  $\text{CO}_2$ ,  $\text{HCO}_3^-$  and serum on these processes.

The parameter of soluble  $\text{CO}_2$  is influenced by multiple parameters such as surface area to volume ratio and aerobic bacterial growth. Therefore, normal growth conditions were determined as 100  $\mu\text{l}$  media/well of a 96 well tissue culture plate for 24h at 37°C in ambient condition (Figure 1). This baseline enabled testing of the different supplements and/or growth conditions on capsule (Figure 1) or toxin (Figure 2, Table 1). Capsule production is induced by the addition of 10% NRS or growth in a 10%  $\text{CO}_2$  atmosphere (Figure 1). The serum capsule induction (in ambient atmosphere) is *atxA* dependent (Figure 2) since there was no significant capsule accumulation in the mutants that did not express *AtxA* (Vollum $\Delta\text{atxA}$  and Vollum $\Delta\text{pXO1}$ ). Alternatively, capsule accumulation in response to  $\text{CO}_2$  enriched atmosphere is *atxA* independent, as there is no significant difference in capsule accumulation under these conditions between *AtxA* expressing and *atxA* null mutants (Figures 2, 3). Toxin secretion, as determined by PA media concentration is serum dependent (Tables 1, 2), as PA could be detected only in NRS supplemented sDMEM regardless of the  $\text{CO}_2$  enriched atmosphere.  $\text{HCO}_3^-$  as serum induced toxin secretion in an *atxA* dependent manner (Figure 3, Table 2) where PA accumulated in the wild type Vollum and not in the *atxA* null mutant. The same NRS/ $\text{HCO}_2^-$  dependence and  $\text{CO}_2$  independence of *pag* (PA) induction was demonstrated using a previously reported mutant strain which is missing *pXO2* and have a chromosomal copy of the *CAP* operon regulated by a *pag* promoter [17]. This mutant strain accumulates capsule when grown in sDMEM that was supplemented with NRS or  $\text{HCO}_3^-$  but not in sDMEM in 10%  $\text{CO}_2$  atmosphere.



We found differences in rates that *B. anthracis* reacts to the different stimulants. Examining the toxins secretion and capsule accumulation after short incubation of 5h.  $\text{HCO}_3^-$  was not as robust as NRS in inducing toxins secretion. Examining the PA concentration after 5h incubation in DMEM supplemented with 0.75%  $\text{HCO}_3^-$  revealed about 1/10 of the concentration after a 24h incubation (Figure 5, Table 3), were with NRS the concentration in these two timepoints was similar. Testing the effect of serum on capsule accumulation reveals that 5h incubation in ambient atmosphere which result in significant PA secretion, did not result in significant capsule accumulation. 5h growth in a 10%  $\text{CO}_2$  atmosphere induced capsule accumulation even in the absence of supplemented NRS or  $\text{HCO}_3^-$  (Table 3). Hence, Serum seemed more effective than  $\text{HCO}_3^-$  in inducing toxin secretion, two process that are *atxA* dependent. The *atxA* independent 10%  $\text{CO}_2$  atmosphere appeared more effective than *atxA* dependent serum for capsule accumulation (Figure 5).

Two major regulators; AcpA and AcpB control capsule biosynthesis by promoting transcription of *acpB,C,A,D,E* operon. *acpA* was shown to be regulated by *atxA* (assumed by  $\text{CO}_2$  and  $\text{HCO}_3^-$ ) and to possess an additional *atxA* independent promoter. We found that by deleting *acpA* the mutant accumulates significantly less capsule in response to  $\text{CO}_2$  but maintain its ability to respond to NRS or  $\text{HCO}_3^-$  (Figure 6). Deletion of *acpB* did not have any effect on capsule accumulation under all tested conditions (Figure 6) which support our previous in vivo data. Deletion of both *atxA* and *acpA* or *acpB* revealed that AcpB activity is strictly *AtxA* dependent under all the conditions tested (Figure 7). AcpA activity is not affected by the absence of *atxA* in the presence of  $\text{CO}_2$ , (Figure 7) but is nulled in response to NRS in an ambient environment (Figure 8).

Our findings support the following regulation cascade;  $\text{CO}_2$  is inducing capsule accumulation via the activation of *acpA* in an *AtxA* independent manner. Serum activate the *AtxA* dependent cascade that induce toxins secretion and eventually capsule accumulation by activating *acpA* and *acpB* (Figure 9) since there was no capsule accumulation following 5h growth in NRS containing in ambient atmosphere (Figure 5).  $\text{HCO}_3^-$  induces toxin secretion by *AtxA* cascade, in a less efficient manner (relative to NRS, Table 3). Direct activation of capsule accumulation by  $\text{HCO}_3^-$  in *AtxA* independent manner could not be eliminated since even in ambient atmosphere, it modifies the levels of soluble  $\text{CO}_2$  ( $\text{PCO}_2$ ) and possibly induces capsule production via *acpA*. Theoretically, this differential regulation of toxins and capsule have logical role in *B. anthracis* pathogenicity. Inhalational and cutaneous infection involve spore engulfing and migration to a draining lymph node. Within the phagocytic (dendritic) cell the spore germinates and produce capsule that protect the bacteria from phagolysis. Toxin production in this stage is counterproductive as it could result in cell arrest that might interfere with the pathogenic pathway. Toxin production may enhance



353 once the bacteria is released from the cell in the lymph node. The serum and CO<sub>2</sub> sensing pathway is still  
354 to be determined and might be common to other pathogens and therefore be a target for therapeutics.

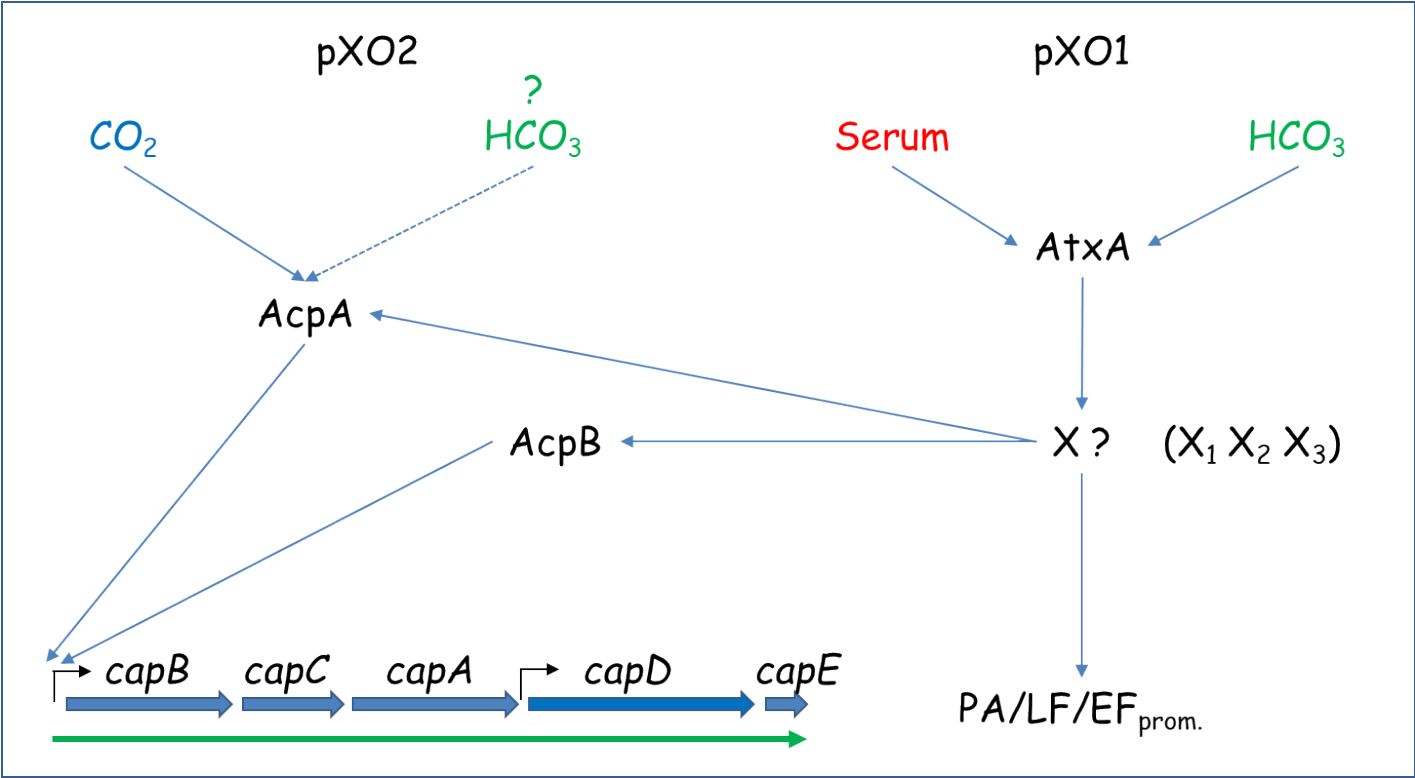

355 Figure 9. Proposed regulation of CO<sub>2</sub>, Serum and HCO<sub>3</sub><sup>-</sup> on capsule production and toxin secretion.

356  
357  
358

## 359 References

- 360 1. Dixon TC, Meselson M, Guillemin J, Hanna PC. Anthrax. *New England Journal of Medicine*.  
361 1999;341(11):815-26. doi: 10.1056/nejm199909093411107. PubMed PMID: 10477781.
- 362 2. Hanna P. Anthrax pathogenesis and host response. *Curr Top Microbiol Immunol*. 1998;225:13-35.  
363 Epub 1997/12/05. PubMed PMID: 9386326.
- 364 3. Swartz MN. Recognition and management of anthrax--an update. *N Engl J Med*.  
365 2001;345(22):1621-6. Epub 2001/11/13. doi: 10.1056/NEJMra012892. PubMed PMID: 11704686.
- 366 4. Candela T, Fouet A. Bacillus anthracis CapD, belonging to the gamma-glutamyltranspeptidase  
367 family, is required for the covalent anchoring of capsule to peptidoglycan. *Mol Microbiol*. 2005;57(3):717-  
368 26. Epub 2005/07/28. doi: 10.1111/j.1365-2958.2005.04718.x. PubMed PMID: 16045616.
- 369 5. Candela T, Mock M, Fouet A. CapE, a 47-amino-acid peptide, is necessary for Bacillus anthracis  
370 polyglutamate capsule synthesis. *J Bacteriol*. 2005;187(22):7765-72. Epub 2005/11/04. doi:  
371 10.1128/JB.187.22.7765-7772.2005. PubMed PMID: 16267300; PubMed Central PMCID:  
372 PMCPMC1280324.
- 373 6. Heine HS, Shadomy SV, Boyer AE, Chuvala L, Riggins R, Kesterson A, et al. Evaluation of  
374 Combination Drug Therapy for Treatment of Antibiotic-Resistant Inhalation Anthrax in a Murine Model.  
375 *Antimicrob Agents Chemother*. 2017;61(9). Epub 2017/07/12. doi: 10.1128/AAC.00788-17. PubMed PMID:  
376 28696235; PubMed Central PMCID: PMCPMC5571330.
- 377 7. Candela T, Fouet A. Poly-gamma-glutamate in bacteria. *Molecular Microbiology*. 2006;60(5):1091-  
378 8. doi: doi:10.1111/j.1365-2958.2006.05179.x.
- 379 8. Wu R, Richter S, Zhang RG, Anderson VJ, Missiakas D, Joachimiak A. Crystal structure of Bacillus  
380 anthracis transpeptidase enzyme CapD. *J Biol Chem*. 2009;284(36):24406-14. Epub 2009/06/19. doi:  
381 10.1074/jbc.M109.019034. PubMed PMID: 19535342; PubMed Central PMCID: PMCPMC2782033.
- 382 9. Richter S, Anderson VJ, Garufi G, Lu L, Budzik JM, Joachimiak A, et al. Capsule anchoring in  
383 Bacillus anthracis occurs by a transpeptidation reaction that is inhibited by capsidin. *Mol Microbiol*.  
384 2009;71(2):404-20. Epub 2008/11/20. doi: 10.1111/j.1365-2958.2008.06533.x. PubMed PMID: 19017271;  
385 PubMed Central PMCID: PMCPMC2770442.
- 386 10. Klimpel KR, Arora N, Leppla SH. Anthrax toxin lethal factor contains a zinc metalloprotease  
387 consensus sequence which is required for lethal toxin activity. *Mol Microbiol*. 1994;13(6):1093-100. Epub  
388 1994/09/01. doi: 10.1111/j.1365-2958.1994.tb00500.x. PubMed PMID: 7854123.
- 389 11. Tang W-J, Guo Q. The adenyl cyclase activity of anthrax edema factor. *Molecular Aspects of*  
390 *Medicine*. 2009;30(6):423-30.
- 391 12. Liu S, Moayeri M, Leppla SH. Anthrax lethal and edema toxins in anthrax pathogenesis. *Trends*  
392 *Microbiol*. 2014;22(6):317-25. Epub 2014/04/02. doi: 10.1016/j.tim.2014.02.012. PubMed PMID:  
393 24684968; PubMed Central PMCID: PMCPMC4041834.
- 394 13. Ebrahimi CM, Kern JW, Sheen TR, Ebrahimi-Fardooee MA, van Sorge NM, Schneewind O, et al.  
395 Penetration of the blood-brain barrier by Bacillus anthracis requires the pXO1-encoded BslA protein. *J*  
396 *Bacteriol*. 2009;191(23):7165-73. Epub 2009/10/13. doi: 10.1128/JB.00903-09. PubMed PMID:  
397 19820089; PubMed Central PMCID: PMCPMC2786561.
- 398 14. Uchida I, Hornung JM, Thorne CB, Klimpel KR, Leppla SH. Cloning and characterization of a gene  
399 whose product is a trans-activator of anthrax toxin synthesis. *J Bacteriol*. 1993;175(17):5329-38. Epub  
400 1993/09/01. doi: 10.1128/jb.175.17.5329-5338.1993. PubMed PMID: 8366021; PubMed Central PMCID:  
401 PMCPMC206586.
- 402 15. Dai Z, Sirard JC, Mock M, Koehler TM. The atxA gene product activates transcription of the  
403 anthrax toxin genes and is essential for virulence. *Mol Microbiol*. 1995;16(6):1171-81. Epub 1995/06/01.  
404 doi: 10.1111/j.1365-2958.1995.tb02340.x. PubMed PMID: 8577251.
- 405 16. Drysdale M, Bourgonne A, Hilsenbeck SG, Koehler TM. atxA controls Bacillus anthracis capsule  
406 synthesis via acpA and a newly discovered regulator, acpB. *J Bacteriol*. 2004;186(2):307-15. Epub

2004/01/02. doi: 10.1128/jb.186.2.307-315.2004. PubMed PMID: 14702298; PubMed Central PMCID: PMC305762.

17. Sittner A, Bar-David E, Glinert I, Ben-Shmuel A, Schlomovitz J, Levy H, et al. Role of *acpA* and *acpB* in *Bacillus anthracis* capsule accumulation and toxin independent pathogenicity in rabbits. *Microb Pathog.* 2021;155:104904. Epub 2021/05/01. doi: 10.1016/j.micpath.2021.104904. PubMed PMID: 33930422.

18. Fouet A. *AtxA*, a *Bacillus anthracis* global virulence regulator. *Res Microbiol.* 2010;161(9):735-42. Epub 2010/09/25. doi: 10.1016/j.resmic.2010.09.006. PubMed PMID: 20863885.

19. Levy H, Glinert I, Weiss S, Sittner A, Schlomovitz J, Altboum Z, et al. Toxin-independent virulence of *Bacillus anthracis* in rabbits. *PLoS One.* 2014;9(1):e84947. Epub 2014/01/15. doi: 10.1371/journal.pone.0084947. PubMed PMID: 24416317; PubMed Central PMCID: PMC3885664.

20. Fouet A, Mock M. Differential influence of the two *Bacillus anthracis* plasmids on regulation of virulence gene expression. *Infect Immun.* 1996;64(12):4928-32. Epub 1996/12/01. doi: 10.1128/IAI.64.12.4928-4932.1996. PubMed PMID: 8945528; PubMed Central PMCID: PMC3174470.

21. Bertin M, Chateau A, Fouet A. Full expression of *Bacillus anthracis* toxin gene in the presence of bicarbonate requires a 2.7-kb-long *atxA* mRNA that contains a terminator structure. *Res Microbiol.* 2010;161(4):249-59. Epub 2010/04/03. doi: 10.1016/j.resmic.2010.03.003. PubMed PMID: 20359529.

22. Vietri NJ, Marrero R, Hoover TA, Welkos SL. Identification and characterization of a trans-activator involved in the regulation of encapsulation by *Bacillus anthracis*. *Gene.* 1995;152(1):1-9. Epub 1995/01/11. doi: 10.1016/0378-1119(94)00662-c. PubMed PMID: 7828912.

23. Levy H, Weiss S, Altboum Z, Schlomovitz J, Glinert I, Sittner A, et al. Differential Contribution of *Bacillus anthracis* Toxins to Pathogenicity in Two Animal Models. *Infect Immun.* 2012;80(8):2623-31. Epub 2012/05/16. doi: IAI.00244-12 [pii] 10.1128/IAI.00244-12. PubMed PMID: 22585968.

24. Levy H, Fisher M, Ariel N, Altboum Z, Kobiler D. Identification of strain specific markers in *Bacillus anthracis* by random amplification of polymorphic DNA. *FEMS Microbiol Lett.* 2005;244(1):199-205. PubMed PMID: 15727841.

25. Levy H, Weiss S, Altboum Z, Schlomovitz J, Rothschild N, Glinert I, et al. The effect of deletion of the edema factor on *Bacillus anthracis* pathogenicity in guinea pigs and rabbits. *Microb Pathog.* 2012;52(1):55-60. Epub 2011/10/25. doi: S0882-4010(11)00184-7 [pii] 10.1016/j.micpath.2011.10.002. PubMed PMID: 22020310.

26. Welkos SL. Plasmid-associated virulence factors of non-toxigenic (pX01-) *Bacillus anthracis*. *Microb Pathog.* 1991;10(3):183-98. Epub 1991/03/01. doi: 10.1016/0882-4010(91)90053-d. PubMed PMID: 1654495.

27. Chiang C, Bongiorno C, Perego M. Glucose-dependent activation of *Bacillus anthracis* toxin gene expression and virulence requires the carbon catabolite protein *CcpA*. *J Bacteriol.* 2011;193(1):52-62. Epub 2010/10/26. doi: 10.1128/JB.01656-09. PubMed PMID: 20971911; PubMed Central PMCID: PMC3019961.

28. McCall RM, Sievers ME, Fattah R, Ghirlando R, Pomerantsev AP, Leppla SH. *Bacillus anthracis* Virulence Regulator *AtxA* Binds Specifically to the *pagA* Promoter Region. *J Bacteriol.* 2019;201(23). Epub 2019/10/02. doi: 10.1128/JB.00569-19. PubMed PMID: 31570528; PubMed Central PMCID: PMC6832065.

29. Guignot J, Mock M, Fouet A. *AtxA* activates the transcription of genes harbored by both *Bacillus anthracis* virulence plasmids. *FEMS Microbiol Lett.* 1997;147(2):203-7. Epub 1997/02/15. doi: 10.1111/j.1574-6968.1997.tb10242.x. PubMed PMID: 9119194.

30. Drysdale M, Bourgogne A, Koehler TM. Transcriptional analysis of the *Bacillus anthracis* capsule regulators. *J Bacteriol.* 2005;187(15):5108-14. Epub 2005/07/21. doi: 10.1128/JB.187.15.5108-5114.2005. PubMed PMID: 16030203; PubMed Central PMCID: PMC1196023.
